# Supplementary material for: Comparative analysis of length-weight relationships and condition factors of two congeneric rockcod species from the shores of King George Island, Antarctica
Source: PeerJ. 2026 Jan 8;14:e20513. doi: 10.7717/peerj.20513 (PMC12790788; doi:10.7717/peerj.20513)
Supplement: Supplemental Information 1 [file peerj-14-20513-s001.xlsx]

## Sheet: Length and Weight data
Number	Total length (mm)	Weight (g)	log of total length (X) mm	log of weight (Y) g	Location	Species			Location A
1	190	88.76	2.27875	1.94822	A	N. coriiceps				n	total length (mm)			total weight (g)
2	180	92.78	2.25527	1.96745	A	N. coriiceps					mean	min	max	mean	min	max
3	180	94.41	2.25527	1.97502	A	N. coriiceps			N. coriiceps	111	273.649	180	420	381.322	88.76	1336.55
4	200	107.37	2.30103	2.03088	A	N. coriiceps			N. rossii	24	273.958	170	350	318.943	60.37	742.7
5	200	109.52	2.30103	2.03949	A	N. coriiceps
6	200	111.97	2.30103	2.0491	A	N. coriiceps
7	215	115	2.33244	2.0607	A	N. coriiceps			Location B
8	215	133.71	2.33244	2.12616	A	N. coriiceps				n	total length (mm)			total weight (g)
9	210	135.73	2.32222	2.13268	A	N. coriiceps					mean	min	max	mean	min	max
10	210	136.43	2.32222	2.13491	A	N. coriiceps			N. coriiceps	37	282.703	220	410	345.274	135.13	962.37
11	200	137.36	2.30103	2.13786	A	N. coriiceps			N. rossii	271	312.214	185	470	432.5	71.54	1229.2
12	215	138.72	2.33244	2.14214	A	N. coriiceps
13	200	144.15	2.30103	2.15881	A	N. coriiceps
14	220	145.7	2.34242	2.16346	A	N. coriiceps
15	210	149.81	2.32222	2.17554	A	N. coriiceps
16	220	155.6	2.34242	2.19201	A	N. coriiceps
17	220	155.92	2.34242	2.1929	A	N. coriiceps
18	220	161.98	2.34242	2.20946	A	N. coriiceps
19	230	166.08	2.36173	2.22032	A	N. coriiceps
20	230	167.52	2.36173	2.22407	A	N. coriiceps
21	230	170.54	2.36173	2.23183	A	N. coriiceps
22	230	171.21	2.36173	2.23353	A	N. coriiceps
23	230	173.57	2.36173	2.23947	A	N. coriiceps
24	220	175.51	2.34242	2.2443	A	N. coriiceps
25	230	176.17	2.36173	2.24593	A	N. coriiceps
26	210	181.6	2.32222	2.25912	A	N. coriiceps
27	240	201.71	2.38021	2.30473	A	N. coriiceps
28	230	205.73	2.36173	2.3133	A	N. coriiceps
29	240	208.56	2.38021	2.31923	A	N. coriiceps
30	235	208.91	2.37107	2.31996	A	N. coriiceps
31	240	210.66	2.38021	2.32358	A	N. coriiceps
32	240	212.77	2.38021	2.32791	A	N. coriiceps
33	240	216.94	2.38021	2.33634	A	N. coriiceps
34	260	218	2.41497	2.33846	A	N. coriiceps
35	240	222	2.38021	2.34635	A	N. coriiceps
36	255	225.8	2.40654	2.35372	A	N. coriiceps
37	250	226.39	2.39794	2.35486	A	N. coriiceps
38	250	226.48	2.39794	2.35503	A	N. coriiceps
39	240	231.56	2.38021	2.36466	A	N. coriiceps
40	250	231.65	2.39794	2.36483	A	N. coriiceps
41	245	233.06	2.38917	2.36747	A	N. coriiceps
42	250	233.9	2.39794	2.36903	A	N. coriiceps
43	245	237.1	2.38917	2.37493	A	N. coriiceps
44	250	237.23	2.39794	2.37517	A	N. coriiceps
45	240	244.21	2.38021	2.38776	A	N. coriiceps
46	255	244.27	2.40654	2.38787	A	N. coriiceps
47	250	254.04	2.39794	2.4049	A	N. coriiceps
48	265	257.5	2.42325	2.41078	A	N. coriiceps
49	255	258.14	2.40654	2.41186	A	N. coriiceps
50	260	263.14	2.41497	2.42019	A	N. coriiceps
51	260	267.69	2.41497	2.42763	A	N. coriiceps
52	250	267.74	2.39794	2.42771	A	N. coriiceps
53	260	295.68	2.41497	2.47082	A	N. coriiceps
54	260	300.609	2.41497	2.478	A	N. coriiceps
55	270	309.42	2.43136	2.49055	A	N. coriiceps
56	270	313.61	2.43136	2.49639	A	N. coriiceps
57	260	316.99	2.41497	2.50105	A	N. coriiceps
58	300	318.9	2.47712	2.50365	A	N. coriiceps
59	265	322.86	2.42325	2.50901	A	N. coriiceps
60	260	326.78	2.41497	2.51426	A	N. coriiceps
61	295	330.41	2.46982	2.51905	A	N. coriiceps
62	275	338.37	2.43933	2.52939	A	N. coriiceps
63	280	339.66	2.44716	2.53104	A	N. coriiceps
64	260	343.78	2.41497	2.53628	A	N. coriiceps
65	270	345.82	2.43136	2.53885	A	N. coriiceps
66	280	351.62	2.44716	2.54607	A	N. coriiceps
67	280	354.32	2.44716	2.5494	A	N. coriiceps
68	260	356.93	2.41497	2.55258	A	N. coriiceps
69	270	361.78	2.43136	2.55844	A	N. coriiceps
70	280	362	2.44716	2.55871	A	N. coriiceps
71	280	385.96	2.44716	2.58654	A	N. coriiceps
72	300	393.32	2.47712	2.59475	A	N. coriiceps
73	300	393.7	2.47712	2.59517	A	N. coriiceps
74	310	398	2.49136	2.59988	A	N. coriiceps
75	295	400.67	2.46982	2.60279	A	N. coriiceps
76	285	411.56	2.45484	2.61443	A	N. coriiceps
77	290	418.45	2.4624	2.62164	A	N. coriiceps
78	285	422.11	2.45484	2.62543	A	N. coriiceps
79	300	425.45	2.47712	2.62885	A	N. coriiceps
80	290	434.65	2.4624	2.63814	A	N. coriiceps
81	300	440.49	2.47712	2.64394	A	N. coriiceps
82	310	444.4	2.49136	2.64777	A	N. coriiceps
83	310	455.73	2.49136	2.65871	A	N. coriiceps
84	300	457.15	2.47712	2.66006	A	N. coriiceps
85	290	469.47	2.4624	2.67161	A	N. coriiceps
86	310	490.07	2.49136	2.69026	A	N. coriiceps
87	320	495.31	2.50515	2.69488	A	N. coriiceps
88	300	505.41	2.47712	2.70364	A	N. coriiceps
89	310	505.49	2.49136	2.70371	A	N. coriiceps
90	310	518.76	2.49136	2.71497	A	N. coriiceps
91	310	535.78	2.49136	2.72899	A	N. coriiceps
92	340	576.32	2.53148	2.76066	A	N. coriiceps
93	330	585.33	2.51851	2.7674	A	N. coriiceps
94	320	588.82	2.50515	2.76998	A	N. coriiceps
95	335	591.04	2.52504	2.77162	A	N. coriiceps
96	320	628.2	2.50515	2.7981	A	N. coriiceps
97	335	648.32	2.52504	2.81179	A	N. coriiceps
98	340	658.86	2.53148	2.81879	A	N. coriiceps
99	350	754.53	2.54407	2.87768	A	N. coriiceps
100	345	788.95	2.53782	2.89705	A	N. coriiceps
101	350	811.79	2.54407	2.90944	A	N. coriiceps
102	360	823.28	2.5563	2.91555	A	N. coriiceps
103	360	836.24	2.5563	2.92233	A	N. coriiceps
104	340	857.19	2.53148	2.93308	A	N. coriiceps
105	390	883.04	2.59106	2.94598	A	N. coriiceps
106	390	1048.4	2.59106	3.02053	A	N. coriiceps
107	390	1083.62	2.59106	3.03488	A	N. coriiceps
108	390	1159.48	2.59106	3.06426	A	N. coriiceps
109	420	1257.69	2.62325	3.09957	A	N. coriiceps
110	400	1275.29	2.60206	3.10561	A	N. coriiceps
111	420	1336.55	2.62325	3.12599	A	N. coriiceps
1	220	135.13	2.34242	2.13075	B	N. coriiceps
2	220	138.11	2.34242	2.14023	B	N. coriiceps
3	240	164.39	2.38021	2.21588	B	N. coriiceps
4	225	181.15	2.35218	2.25804	B	N. coriiceps
5	240	199.64	2.38021	2.30025	B	N. coriiceps
6	240	217.65	2.38021	2.33776	B	N. coriiceps
7	265	231.68	2.42325	2.36489	B	N. coriiceps
8	265	236.42	2.42325	2.37368	B	N. coriiceps
9	270	254	2.43136	2.40483	B	N. coriiceps
10	270	257.04	2.43136	2.41	B	N. coriiceps
11	270	259.61	2.43136	2.41432	B	N. coriiceps
12	260	269.32	2.41497	2.43027	B	N. coriiceps
13	265	271.32	2.42325	2.43348	B	N. coriiceps
14	270	275.41	2.43136	2.43998	B	N. coriiceps
15	280	275.75	2.44716	2.44052	B	N. coriiceps
16	270	285.61	2.43136	2.45577	B	N. coriiceps
17	280	294.56	2.44716	2.46917	B	N. coriiceps
18	270	315.56	2.43136	2.49908	B	N. coriiceps
19	285	319.44	2.45484	2.50439	B	N. coriiceps
20	260	323.7	2.41497	2.51014	B	N. coriiceps
21	290	342.14	2.4624	2.5342	B	N. coriiceps
22	290	346.33	2.4624	2.53949	B	N. coriiceps
23	290	355.34	2.4624	2.55064	B	N. coriiceps
24	285	358.31	2.45484	2.55426	B	N. coriiceps
25	305	363.38	2.4843	2.56036	B	N. coriiceps
26	290	366.32	2.4624	2.56386	B	N. coriiceps
27	305	372.11	2.4843	2.57067	B	N. coriiceps
28	300	398.41	2.47712	2.60033	B	N. coriiceps
29	290	410.28	2.4624	2.61308	B	N. coriiceps
30	295	428.52	2.46982	2.63197	B	N. coriiceps
31	315	441.16	2.49831	2.6446	B	N. coriiceps
32	325	465.43	2.51188	2.66785	B	N. coriiceps
33	320	479.61	2.50515	2.68089	B	N. coriiceps
34	320	502.47	2.50515	2.70111	B	N. coriiceps
35	325	627.94	2.51188	2.79792	B	N. coriiceps
36	340	649.51	2.53148	2.81259	B	N. coriiceps
37	410	962.37	2.61278	2.98334	B	N. coriiceps
112	170	60.37	2.23045	1.78082	A	N. rossii
113	185	87.95	2.26717	1.94424	A	N. rossii
114	190	92.18	2.27875	1.96464	A	N. rossii
115	210	126.15	2.32222	2.10089	A	N. rossii
116	240	162.05	2.38021	2.20965	A	N. rossii
117	240	225.54	2.38021	2.35322	A	N. rossii
118	260	238.28	2.41497	2.37709	A	N. rossii
119	260	242.88	2.41497	2.38539	A	N. rossii
120	245	243.89	2.38917	2.38719	A	N. rossii
121	275	260.95	2.43933	2.41656	A	N. rossii
122	290	263.9	2.4624	2.42144	A	N. rossii
123	275	275.34	2.43933	2.43987	A	N. rossii
124	280	280.6	2.44716	2.44809	A	N. rossii
125	280	310.88	2.44716	2.49259	A	N. rossii
126	300	337.16	2.47712	2.52784	A	N. rossii
127	290	363.33	2.4624	2.5603	A	N. rossii
128	290	363.6	2.4624	2.56062	A	N. rossii
129	300	370.86	2.47712	2.56921	A	N. rossii
130	340	424.8	2.53148	2.62818	A	N. rossii
131	335	491.85	2.52504	2.69183	A	N. rossii
132	300	522.01	2.47712	2.71768	A	N. rossii
133	350	577.75	2.54407	2.76174	A	N. rossii
134	330	589.61	2.51851	2.77056	A	N. rossii
135	340	742.7	2.53148	2.87081	A	N. rossii
310	440	1229.2	2.64345	3.08962	B	N. rossii
309	450	1215.2	2.65321	3.08465	B	N. rossii
308	470	1170.04	2.6721	3.0682	B	N. rossii
307	440	1120.05	2.64345	3.04924	B	N. rossii
306	425	1109.32	2.62839	3.04506	B	N. rossii
304	420	1063.63	2.62325	3.02679	B	N. rossii
303	410	1023	2.61278	3.00988	B	N. rossii
302	425	1017.36	2.62839	3.00747	B	N. rossii
301	430	1011.73	2.63347	3.00506	B	N. rossii
300	425	974.61	2.62839	2.98883	B	N. rossii
299	410	962.37	2.61278	2.98334	B	N. rossii
298	435	953.51	2.63849	2.97933	B	N. rossii
297	430	943.84	2.63347	2.9749	B	N. rossii
296	430	937.01	2.63347	2.97174	B	N. rossii
295	420	908.18	2.62325	2.95817	B	N. rossii
294	410	900.36	2.61278	2.95442	B	N. rossii
293	400	895.95	2.60206	2.95228	B	N. rossii
292	430	867.2	2.63347	2.93812	B	N. rossii
291	410	823.81	2.61278	2.91583	B	N. rossii
290	400	810.57	2.60206	2.90879	B	N. rossii
289	390	774.2	2.59106	2.88885	B	N. rossii
288	390	758.12	2.59106	2.87974	B	N. rossii
287	390	756.35	2.59106	2.87872	B	N. rossii
286	360	754.41	2.5563	2.87761	B	N. rossii
285	375	749.69	2.57403	2.87488	B	N. rossii
284	390	743.54	2.59106	2.8713	B	N. rossii
283	390	729.75	2.59106	2.86317	B	N. rossii
282	360	718.87	2.5563	2.85665	B	N. rossii
281	390	713.93	2.59106	2.85366	B	N. rossii
280	350	700.09	2.54407	2.84515	B	N. rossii
279	390	696.03	2.59106	2.84263	B	N. rossii
277	370	684.4	2.5682	2.83531	B	N. rossii
276	390	683.48	2.59106	2.83473	B	N. rossii
275	370	683.41	2.5682	2.83468	B	N. rossii
274	355	669.55	2.55023	2.82578	B	N. rossii
273	370	666.75	2.5682	2.82396	B	N. rossii
272	380	650.5	2.57978	2.81325	B	N. rossii
271	370	648.02	2.5682	2.81159	B	N. rossii
270	360	645.7	2.5563	2.81003	B	N. rossii
269	350	642.64	2.54407	2.80797	B	N. rossii
268	370	640.32	2.5682	2.8064	B	N. rossii
267	370	640.27	2.5682	2.80636	B	N. rossii
266	350	638.7	2.54407	2.8053	B	N. rossii
265	380	635.72	2.57978	2.80327	B	N. rossii
264	360	634.22	2.5563	2.80224	B	N. rossii
263	340	632.79	2.53148	2.80126	B	N. rossii
262	360	630.66	2.5563	2.7998	B	N. rossii
261	352	628.47	2.54654	2.79828	B	N. rossii
260	390	627.66	2.59106	2.79772	B	N. rossii
259	370	621.36	2.5682	2.79334	B	N. rossii
258	355	618.89	2.55023	2.79161	B	N. rossii
257	370	616.92	2.5682	2.79023	B	N. rossii
256	345	611.9	2.53782	2.78668	B	N. rossii
255	380	611.39	2.57978	2.78632	B	N. rossii
254	350	602.01	2.54407	2.7796	B	N. rossii
253	375	600.06	2.57403	2.77819	B	N. rossii
252	355	597.62	2.55023	2.77643	B	N. rossii
251	355	596.91	2.55023	2.77591	B	N. rossii
250	365	596.5	2.56229	2.77561	B	N. rossii
249	365	596.45	2.56229	2.77557	B	N. rossii
248	350	596.04	2.54407	2.77528	B	N. rossii
247	350	593.41	2.54407	2.77335	B	N. rossii
246	370	592.55	2.5682	2.77273	B	N. rossii
245	345	591.73	2.53782	2.77212	B	N. rossii
244	350	584.94	2.54407	2.76711	B	N. rossii
243	340	583.31	2.53148	2.7659	B	N. rossii
242	340	581.67	2.53148	2.76468	B	N. rossii
241	345	580.15	2.53782	2.76354	B	N. rossii
240	350	578.12	2.54407	2.76202	B	N. rossii
239	340	568.33	2.53148	2.7546	B	N. rossii
238	350	565.02	2.54407	2.75206	B	N. rossii
237	365	564.15	2.56229	2.75139	B	N. rossii
236	360	564.04	2.5563	2.75131	B	N. rossii
235	345	562.35	2.53782	2.75001	B	N. rossii
234	350	562.23	2.54407	2.74991	B	N. rossii
233	340	557.24	2.53148	2.74604	B	N. rossii
232	340	547.87	2.53148	2.73868	B	N. rossii
231	330	546.69	2.51851	2.73774	B	N. rossii
230	345	541.6	2.53782	2.73368	B	N. rossii
229	330	538.34	2.51851	2.73106	B	N. rossii
228	360	536.02	2.5563	2.72918	B	N. rossii
227	360	535.25	2.5563	2.72856	B	N. rossii
226	330	533.19	2.51851	2.72688	B	N. rossii
225	330	529.36	2.51851	2.72375	B	N. rossii
224	350	528.27	2.54407	2.72286	B	N. rossii
223	335	520.4	2.52504	2.71634	B	N. rossii
222	340	519.93	2.53148	2.71594	B	N. rossii
221	345	517.04	2.53782	2.71352	B	N. rossii
220	350	513.7	2.54407	2.71071	B	N. rossii
219	340	510.04	2.53148	2.7076	B	N. rossii
218	330	507	2.51851	2.70501	B	N. rossii
217	350	505.69	2.54407	2.70388	B	N. rossii
216	330	499.05	2.51851	2.69814	B	N. rossii
215	325	492.25	2.51188	2.69219	B	N. rossii
214	345	491.14	2.53782	2.69121	B	N. rossii
213	320	490.93	2.50515	2.69102	B	N. rossii
212	340	488.9	2.53148	2.68922	B	N. rossii
211	335	488.54	2.52504	2.6889	B	N. rossii
210	335	485.53	2.52504	2.68622	B	N. rossii
209	340	485.03	2.53148	2.68577	B	N. rossii
208	335	483.38	2.52504	2.68429	B	N. rossii
207	315	480.75	2.49831	2.68192	B	N. rossii
206	325	478.72	2.51188	2.68008	B	N. rossii
205	335	476.21	2.52504	2.6778	B	N. rossii
204	330	474.67	2.51851	2.67639	B	N. rossii
203	350	472.41	2.54407	2.67432	B	N. rossii
202	340	469.3	2.53148	2.67145	B	N. rossii
201	315	463.01	2.49831	2.66559	B	N. rossii
200	320	460.95	2.50515	2.66365	B	N. rossii
199	310	458.14	2.49136	2.661	B	N. rossii
198	315	454.45	2.49831	2.65749	B	N. rossii
197	330	449.26	2.51851	2.6525	B	N. rossii
196	325	446.35	2.51188	2.64968	B	N. rossii
195	325	445.8	2.51188	2.64914	B	N. rossii
194	320	443.43	2.50515	2.64683	B	N. rossii
193	320	442.72	2.50515	2.64613	B	N. rossii
192	315	442.04	2.49831	2.64546	B	N. rossii
191	330	428.7	2.51851	2.63215	B	N. rossii
190	325	426.97	2.51188	2.6304	B	N. rossii
189	315	425.39	2.49831	2.62879	B	N. rossii
188	330	422.93	2.51851	2.62627	B	N. rossii
187	315	421.85	2.49831	2.62516	B	N. rossii
186	295	420.64	2.46982	2.62391	B	N. rossii
185	320	419.96	2.50515	2.62321	B	N. rossii
184	330	417.52	2.51851	2.62068	B	N. rossii
183	310	415.65	2.49136	2.61873	B	N. rossii
182	320	414.89	2.50515	2.61793	B	N. rossii
181	310	411.25	2.49136	2.61411	B	N. rossii
180	315	410.1	2.49831	2.61289	B	N. rossii
179	330	410.07	2.51851	2.61286	B	N. rossii
178	305	409.95	2.4843	2.61273	B	N. rossii
177	320	408.12	2.50515	2.61079	B	N. rossii
176	325	406.01	2.51188	2.60854	B	N. rossii
175	315	399.88	2.49831	2.60193	B	N. rossii
174	320	399.54	2.50515	2.60156	B	N. rossii
173	320	397.55	2.50515	2.59939	B	N. rossii
172	325	396.45	2.51188	2.59819	B	N. rossii
171	310	393.32	2.49136	2.59475	B	N. rossii
170	290	391.01	2.4624	2.59219	B	N. rossii
169	320	388.45	2.50515	2.58934	B	N. rossii
168	310	388.14	2.49136	2.58899	B	N. rossii
167	318	388	2.50243	2.58883	B	N. rossii
166	320	386.51	2.50515	2.58716	B	N. rossii
165	315	386.21	2.49831	2.58682	B	N. rossii
164	310	383.92	2.49136	2.58424	B	N. rossii
163	320	381.72	2.50515	2.58174	B	N. rossii
162	330	380.49	2.51851	2.58034	B	N. rossii
161	310	380.22	2.49136	2.58003	B	N. rossii
160	310	373.97	2.49136	2.57284	B	N. rossii
159	300	372.81	2.47712	2.57149	B	N. rossii
158	305	371.7	2.4843	2.57019	B	N. rossii
157	300	362.81	2.47712	2.55968	B	N. rossii
156	320	361.76	2.50515	2.55842	B	N. rossii
155	310	360.5	2.49136	2.55691	B	N. rossii
154	300	360.43	2.47712	2.55682	B	N. rossii
153	310	360.12	2.49136	2.55645	B	N. rossii
152	290	357.39	2.4624	2.55314	B	N. rossii
151	300	354.76	2.47712	2.54993	B	N. rossii
150	320	354.28	2.50515	2.54935	B	N. rossii
149	320	350.23	2.50515	2.54435	B	N. rossii
148	300	349.6	2.47712	2.54357	B	N. rossii
147	300	346.83	2.47712	2.54012	B	N. rossii
146	295	343.64	2.46982	2.5361	B	N. rossii
145	290	343.53	2.4624	2.53596	B	N. rossii
144	310	341.36	2.49136	2.53321	B	N. rossii
143	285	340.75	2.45484	2.53244	B	N. rossii
142	305	336.2	2.4843	2.5266	B	N. rossii
141	290	334.3	2.4624	2.52414	B	N. rossii
140	300	331.96	2.47712	2.52109	B	N. rossii
139	310	329.11	2.49136	2.51734	B	N. rossii
137	310	327.53	2.49136	2.51525	B	N. rossii
138	295	327.53	2.46982	2.51525	B	N. rossii
136	290	327.07	2.4624	2.51464	B	N. rossii
135	290	323.91	2.4624	2.51042	B	N. rossii
134	350	323.84	2.54407	2.51033	B	N. rossii
133	285	323.09	2.45484	2.50932	B	N. rossii
132	300	321.72	2.47712	2.50748	B	N. rossii
131	300	320.24	2.47712	2.50548	B	N. rossii
130	270	310.81	2.43136	2.49249	B	N. rossii
129	290	309.02	2.4624	2.48999	B	N. rossii
128	275	307.54	2.43933	2.4879	B	N. rossii
127	295	306.63	2.46982	2.48661	B	N. rossii
126	285	305.82	2.45484	2.48547	B	N. rossii
125	290	305.65	2.4624	2.48522	B	N. rossii
124	295	305.32	2.46982	2.48476	B	N. rossii
123	300	304.72	2.47712	2.4839	B	N. rossii
122	280	299.35	2.44716	2.47618	B	N. rossii
121	280	298.67	2.44716	2.47519	B	N. rossii
120	275	287.37	2.43933	2.45844	B	N. rossii
119	285	287.01	2.45484	2.4579	B	N. rossii
118	290	282.76	2.4624	2.45142	B	N. rossii
117	280	281.96	2.44716	2.45019	B	N. rossii
116	275	276.51	2.43933	2.44171	B	N. rossii
115	275	273.85	2.43933	2.43751	B	N. rossii
114	280	273.02	2.44716	2.43619	B	N. rossii
113	275	269.79	2.43933	2.43103	B	N. rossii
112	285	262.66	2.45484	2.41939	B	N. rossii
111	280	262.03	2.44716	2.41835	B	N. rossii
110	270	252.03	2.43136	2.40145	B	N. rossii
109	270	249.62	2.43136	2.39728	B	N. rossii
108	260	246.14	2.41497	2.39118	B	N. rossii
107	270	244.76	2.43136	2.38874	B	N. rossii
106	265	241.49	2.42325	2.3829	B	N. rossii
105	280	241.42	2.44716	2.38277	B	N. rossii
104	260	240.1	2.41497	2.38039	B	N. rossii
103	255	238.5	2.40654	2.37749	B	N. rossii
102	270	237.42	2.43136	2.37552	B	N. rossii
101	260	236.18	2.41497	2.37324	B	N. rossii
100	270	235.14	2.43136	2.37133	B	N. rossii
99	270	234.52	2.43136	2.37018	B	N. rossii
98	270	224.82	2.43136	2.35183	B	N. rossii
97	250	218.05	2.39794	2.33856	B	N. rossii
96	240	217.05	2.38021	2.33656	B	N. rossii
95	260	215.06	2.41497	2.33256	B	N. rossii
94	260	213.23	2.41497	2.32885	B	N. rossii
93	250	211.57	2.39794	2.32545	B	N. rossii
92	260	210.2	2.41497	2.32263	B	N. rossii
91	255	208.33	2.40654	2.31875	B	N. rossii
90	270	206.32	2.43136	2.31454	B	N. rossii
89	240	202.96	2.38021	2.30741	B	N. rossii
88	250	201.43	2.39794	2.30412	B	N. rossii
87	250	194.04	2.39794	2.28789	B	N. rossii
86	250	192.11	2.39794	2.28355	B	N. rossii
85	235	190.33	2.37107	2.27951	B	N. rossii
84	250	187.28	2.39794	2.27249	B	N. rossii
83	240	185.98	2.38021	2.26947	B	N. rossii
82	250	183.9	2.39794	2.26458	B	N. rossii
81	245	183.79	2.38917	2.26432	B	N. rossii
80	240	182.14	2.38021	2.26041	B	N. rossii
79	240	179.8	2.38021	2.25479	B	N. rossii
78	250	179.45	2.39794	2.25394	B	N. rossii
77	235	175.53	2.37107	2.24435	B	N. rossii
76	230	173.81	2.36173	2.24007	B	N. rossii
75	250	172.21	2.39794	2.23606	B	N. rossii
74	240	171.9	2.38021	2.23528	B	N. rossii
73	235	171.48	2.37107	2.23421	B	N. rossii
72	250	168.82	2.39794	2.22742	B	N. rossii
71	245	167.61	2.38917	2.2243	B	N. rossii
70	240	167.57	2.38021	2.2242	B	N. rossii
69	240	164.42	2.38021	2.21595	B	N. rossii
68	230	164.12	2.36173	2.21516	B	N. rossii
67	240	163.3	2.38021	2.21299	B	N. rossii
66	220	163.15	2.34242	2.21259	B	N. rossii
65	240	162.04	2.38021	2.20962	B	N. rossii
64	225	161.13	2.35218	2.20718	B	N. rossii
63	230	160.56	2.36173	2.20564	B	N. rossii
62	235	160.17	2.37107	2.20458	B	N. rossii
61	245	157.32	2.38917	2.19678	B	N. rossii
60	235	153.46	2.37107	2.186	B	N. rossii
59	215	149.72	2.33244	2.17528	B	N. rossii
58	225	146.93	2.35218	2.16711	B	N. rossii
57	230	146.76	2.36173	2.16661	B	N. rossii
56	230	141.21	2.36173	2.14987	B	N. rossii
55	230	140.04	2.36173	2.14625	B	N. rossii
54	230	136.09	2.36173	2.13383	B	N. rossii
53	225	129.64	2.35218	2.11274	B	N. rossii
52	215	129.04	2.33244	2.11072	B	N. rossii
51	220	128.55	2.34242	2.10907	B	N. rossii
50	230	128.05	2.36173	2.10738	B	N. rossii
49	245	125.56	2.38917	2.09885	B	N. rossii
48	220	123.26	2.34242	2.09082	B	N. rossii
47	250	123.06	2.39794	2.09012	B	N. rossii
46	210	122.98	2.32222	2.08983	B	N. rossii
45	200	120.91	2.30103	2.08246	B	N. rossii
44	215	116.42	2.33244	2.06603	B	N. rossii
43	205	111.55	2.31175	2.04747	B	N. rossii
42	215	108.68	2.33244	2.03615	B	N. rossii
41	210	106.55	2.32222	2.02755	B	N. rossii
40	210	99.84	2.32222	1.9993	B	N. rossii
39	185	78.77	2.26717	1.89636	B	N. rossii
38	190	71.54	2.27875	1.85455	B	N. rossii

## Sheet: Regression analysis results
Length Weight Relationship (LWR) of N.C in location A									Graphs
SUMMARY OUTPUT
Regression Statistics
Multiple R	0.985144
R Square	0.97051
Adjusted R Square	0.970239
Standard Error	0.0474425
Observations	111
ANOVA
	df	SS	MS	F	Significance F
Regression	1	8.07383	8.07383	3587.11	3.06387e-85		95% CI of a
Residual	109	0.245336	0.00225079				lower	upper
Total	110	8.31916					1.87887e-06	6.31916e-06											Summary output of Excel regression with Log L (mm) on the X-axis and Log W (g) on the Y-axis.
	Coefficients	Standard Error	t Stat	P-value	Lower 95%	Upper 95%	Lower 95.0%	Upper 95.0%
Intercept	-5.46272	0.132889	-41.1075	3.45467e-68	-5.7261	-5.19934	-5.7261	-5.19934
X 1	3.27443	0.0546718	59.8925	3.06387e-85	3.16607	3.38279	3.16607	3.38279
																						If the p-value is not significant, the null hypothesis (H₀) is accepted.
Length Weight Relationship (LWR) of N.R in location A									Graphs												ts performs a t-test (T.DIST.2T) on the b value
SUMMARY OUTPUT
Regression Statistics																		A	NC_locationA_ts	5.01957					NC combined location A, B ts	4.14034
Multiple R	0.972432																		P-value	2.03142e-06	Allometric growth	<0.05	A+		P-value	5.84075e-05	Allometric growth	<0.05	A+
R Square	0.945623
Adjusted R Square	0.943151																		NR_locationA_ts	0.657044					NR combined location A, B ts	1.17546
Standard Error	0.0652347																		P-value	0.517968	Isometric growth	>0.05	A0		P-value	0.240765	Isometric growth	>0.05	A0
Observations	24
																		B	NC_locationB_ts	1.19794
ANOVA																			P-value	0.23899	Isometric growth	>0.05	A0
	df	SS	MS	F	Significance F
Regression	1	1.62811	1.62811	382.583	2.12064e-15		95% CI of a												NR_locationB_ts	1.75195
Residual	22	0.0936225	0.00425557				lower	upper											P-value	0.0809224	Isometric growth	>0.05	A0
Total	23	1.72173					1.22688e-06	4.8908e-05
	Coefficients	Standard Error	t Stat	P-value	Lower 95%	Upper 95%	Lower 95.0%	Upper 95.0%												lower 95% CL	upper 95% CL
Intercept	-5.11091	0.385891	-13.2444	5.84351e-12	-5.9112	-4.31062	-5.9112	-4.31062											NR_locationA	1.22688e-06	4.8908e-05
X 1	3.10428	0.158708	19.5597	2.12064e-15	2.77514	3.43342	2.77514	3.43342											NR_locationB	6.04858e-06	1.33629e-05
																			NC_locationA	1.87887e-06	6.31916e-06
																			NC_locationB	1.1046e-06	2.78362e-05
Length Weight Relationship (LWR) of N.C in location B									Graphs
SUMMARY OUTPUT
Regression Statistics
Multiple R	0.967071
R Square	0.935227
Adjusted R Square	0.933376
Standard Error	0.0461924
Observations	37
ANOVA
	df	SS	MS	F	Significance F
Regression	1	1.07828	1.07828	505.347	2.18755e-22		95% CI of a
Residual	35	0.0746807	0.00213373				lower	upper
Total	36	1.15296					1.1046e-06	2.78362e-05
	Coefficients	Standard Error	t Stat	P-value	Lower 95%	Upper 95%	Lower 95.0%	Upper 95.0%
Intercept	-5.25609	0.345156	-15.2282	5.19674e-17	-5.9568	-4.55539	-5.9568	-4.55539
X 1	3.16887	0.140964	22.4799	2.18755e-22	2.88269	3.45504	2.88269	3.45504
Length Weight Relationship (LWR) of N.R in location B									Graphs
SUMMARY OUTPUT
Regression Statistics
Multiple R	0.982744
R Square	0.965786
Adjusted R Square	0.965658
Standard Error	0.0470391
Observations	271
ANOVA
	df	SS	MS	F	Significance F
Regression	1	16.8013	16.8013	7593.19	3.50945e-199		95% CI of a
Residual	269	0.59521	0.00221268				lower	upper
Total	270	17.3965					6.04858e-06	1.33629e-05
	Coefficients	Standard Error	t Stat	P-value	Lower 95%	Upper 95%	Lower 95.0%	Upper 95.0%
Intercept	-5.04622	0.0874247	-57.7208	1.48312e-153	-5.21835	-4.8741	-5.21835	-4.8741
X 1	3.06155	0.0351342	87.1389	3.50945e-199	2.99238	3.13073	2.99238	3.13073
Length Weight Relationship (LWR) of N.C in combined locations (Total NC)
SUMMARY OUTPUT
Regression Statistics
Multiple R	0.97899
R Square	0.958421
Adjusted R Square	0.958136
Standard Error	0.0519447
Observations	148
ANOVA
	df	SS	MS	F	Significance F
Regression	1	9.0806	9.0806	3365.37	1.0141e-102		95% CI of a
Residual	146	0.393944	0.00269825				lower	upper
Total	147	9.47455					2.30717e-06	7.9268e-06
	Coefficients	Standard Error	t Stat	P-value	Lower 95%	Upper 95%	Lower 95.0%	Upper 95.0%
Intercept	-5.36891	0.135609	-39.5913	5.79295e-80	-5.63692	-5.1009	-5.63692	-5.1009
X Variable 1	3.23057	0.0556881	58.0118	1.0141e-102	3.12051	3.34063	3.12051	3.34063
Length Weight Relationship (LWR) of N.R in combined locations (Total NR)
SUMMARY OUTPUT
Regression Statistics
Multiple R	0.981332
R Square	0.963013
Adjusted R Square	0.962887
Standard Error	0.0496419
Observations	295
ANOVA
	df	SS	MS	F	Significance F
Regression	1	18.7997	18.7997	7628.76	7.85245e-212		95% CI of a
Residual	293	0.722044	0.00246432				lower	upper
Total	294	19.5217					6.8862e-06	1.50784e-05
	Coefficients	Standard Error	t Stat	P-value	Lower 95%	Upper 95%	Lower 95.0%	Upper 95.0%
Intercept	-4.99183	0.0864736	-57.7266	4.33882e-162	-5.16202	-4.82164	-5.16202	-4.82164
X 1	3.04092	0.034816	87.3428	7.85245e-212	2.9724	3.10945	2.9724	3.10945

## Sheet: Linear regressions on log_LW
NR.A		NR.B		NC.A		NC.B
Log Length mm	Log Weight	Log L mm	Log W	Log L mm	Log W	Log L mm	Log W
2.23045	1.78082	2.64345	3.08962	2.27875	1.94822	2.34242	2.13075
2.26717	1.94424	2.65321	3.08465	2.25527	1.96745	2.34242	2.14023
2.27875	1.96464	2.6721	3.0682	2.25527	1.97502	2.38021	2.21588
2.32222	2.10089	2.64345	3.04924	2.30103	2.03088	2.35218	2.25804
2.38021	2.20965	2.62839	3.04506	2.30103	2.03949	2.38021	2.30025
2.38021	2.35322	2.62325	3.02679	2.30103	2.0491	2.38021	2.33776
2.41497	2.37709	2.61278	3.00988	2.33244	2.0607	2.42325	2.36489
2.41497	2.38539	2.62839	3.00747	2.33244	2.12616	2.42325	2.37368
2.38917	2.38719	2.63347	3.00506	2.32222	2.13268	2.43136	2.40483
2.43933	2.41656	2.62839	2.98883	2.32222	2.13491	2.43136	2.41
2.4624	2.42144	2.61278	2.98334	2.30103	2.13786	2.43136	2.41432
2.43933	2.43987	2.63849	2.97933	2.33244	2.14214	2.41497	2.43027
2.44716	2.44809	2.63347	2.9749	2.30103	2.15881	2.42325	2.43348
2.44716	2.49259	2.63347	2.97174	2.34242	2.16346	2.43136	2.43998
2.47712	2.52784	2.62325	2.95817	2.32222	2.17554	2.44716	2.44052
2.4624	2.5603	2.61278	2.95442	2.34242	2.19201	2.43136	2.45577
2.4624	2.56062	2.60206	2.95228	2.34242	2.1929	2.44716	2.46917
2.47712	2.56921	2.63347	2.93812	2.34242	2.20946	2.43136	2.49908
2.53148	2.62818	2.61278	2.91583	2.36173	2.22032	2.45484	2.50439
2.52504	2.69183	2.60206	2.90879	2.36173	2.22407	2.41497	2.51014
2.47712	2.71768	2.59106	2.88885	2.36173	2.23183	2.4624	2.5342
2.54407	2.76174	2.59106	2.87974	2.36173	2.23353	2.4624	2.53949
2.51851	2.77056	2.59106	2.87872	2.36173	2.23947	2.4624	2.55064
2.53148	2.87081	2.5563	2.87761	2.34242	2.2443	2.45484	2.55426
		2.57403	2.87488	2.36173	2.24593	2.4843	2.56036
		2.59106	2.8713	2.32222	2.25912	2.4624	2.56386
		2.59106	2.86317	2.38021	2.30473	2.4843	2.57067
		2.5563	2.85665	2.36173	2.3133	2.47712	2.60033
		2.59106	2.85366	2.38021	2.31923	2.4624	2.61308
		2.54407	2.84515	2.37107	2.31996	2.46982	2.63197
		2.59106	2.84263	2.38021	2.32358	2.49831	2.6446
		2.5682	2.83531	2.38021	2.32791	2.51188	2.66785
		2.59106	2.83473	2.38021	2.33634	2.50515	2.68089
		2.5682	2.83468	2.41497	2.33846	2.50515	2.70111
		2.55023	2.82578	2.38021	2.34635	2.51188	2.79792
		2.5682	2.82396	2.40654	2.35372	2.53148	2.81259
		2.57978	2.81325	2.39794	2.35486	2.61278	2.98334
		2.5682	2.81159	2.39794	2.35503
		2.5563	2.81003	2.38021	2.36466
		2.54407	2.80797	2.39794	2.36483
		2.5682	2.8064	2.38917	2.36747
		2.5682	2.80636	2.39794	2.36903
		2.54407	2.8053	2.38917	2.37493
		2.57978	2.80327	2.39794	2.37517
		2.5563	2.80224	2.38021	2.38776
		2.53148	2.80126	2.40654	2.38787
		2.5563	2.7998	2.39794	2.4049
		2.54654	2.79828	2.42325	2.41078
		2.59106	2.79772	2.40654	2.41186
		2.5682	2.79334	2.41497	2.42019
		2.55023	2.79161	2.41497	2.42763
		2.5682	2.79023	2.39794	2.42771
		2.53782	2.78668	2.41497	2.47082
		2.57978	2.78632	2.41497	2.478
		2.54407	2.7796	2.43136	2.49055
		2.57403	2.77819	2.43136	2.49639
		2.55023	2.77643	2.41497	2.50105
		2.55023	2.77591	2.47712	2.50365
		2.56229	2.77561	2.42325	2.50901
		2.56229	2.77557	2.41497	2.51426
		2.54407	2.77528	2.46982	2.51905
		2.54407	2.77335	2.43933	2.52939
		2.5682	2.77273	2.44716	2.53104
		2.53782	2.77212	2.41497	2.53628
		2.54407	2.76711	2.43136	2.53885
		2.53148	2.7659	2.44716	2.54607
		2.53148	2.76468	2.44716	2.5494
		2.53782	2.76354	2.41497	2.55258
		2.54407	2.76202	2.43136	2.55844
		2.53148	2.7546	2.44716	2.55871
		2.54407	2.75206	2.44716	2.58654
		2.56229	2.75139	2.47712	2.59475
		2.5563	2.75131	2.47712	2.59517
		2.53782	2.75001	2.49136	2.59988
		2.54407	2.74991	2.46982	2.60279
		2.53148	2.74604	2.45484	2.61443
		2.53148	2.73868	2.4624	2.62164
		2.51851	2.73774	2.45484	2.62543
		2.53782	2.73368	2.47712	2.62885
		2.51851	2.73106	2.4624	2.63814
		2.5563	2.72918	2.47712	2.64394
		2.5563	2.72856	2.49136	2.64777
		2.51851	2.72688	2.49136	2.65871
		2.51851	2.72375	2.47712	2.66006
		2.54407	2.72286	2.4624	2.67161
		2.52504	2.71634	2.49136	2.69026
		2.53148	2.71594	2.50515	2.69488
		2.53782	2.71352	2.47712	2.70364
		2.54407	2.71071	2.49136	2.70371
		2.53148	2.7076	2.49136	2.71497
		2.51851	2.70501	2.49136	2.72899
		2.54407	2.70388	2.53148	2.76066
		2.51851	2.69814	2.51851	2.7674
		2.51188	2.69219	2.50515	2.76998
		2.53782	2.69121	2.52504	2.77162
		2.50515	2.69102	2.50515	2.7981
		2.53148	2.68922	2.52504	2.81179
		2.52504	2.6889	2.53148	2.81879
		2.52504	2.68622	2.54407	2.87768
		2.53148	2.68577	2.53782	2.89705
		2.52504	2.68429	2.54407	2.90944
		2.49831	2.68192	2.5563	2.91555
		2.51188	2.68008	2.5563	2.92233
		2.52504	2.6778	2.53148	2.93308
		2.51851	2.67639	2.59106	2.94598
		2.54407	2.67432	2.59106	3.02053
		2.53148	2.67145	2.59106	3.03488
		2.49831	2.66559	2.59106	3.06426
		2.50515	2.66365	2.62325	3.09957
		2.49136	2.661	2.60206	3.10561
		2.49831	2.65749	2.62325	3.12599
		2.51851	2.6525
		2.51188	2.64968
		2.51188	2.64914
		2.50515	2.64683
		2.50515	2.64613
		2.49831	2.64546
		2.51851	2.63215
		2.51188	2.6304
		2.49831	2.62879
		2.51851	2.62627
		2.49831	2.62516
		2.46982	2.62391
		2.50515	2.62321
		2.51851	2.62068
		2.49136	2.61873
		2.50515	2.61793
		2.49136	2.61411
		2.49831	2.61289
		2.51851	2.61286
		2.4843	2.61273
		2.50515	2.61079
		2.51188	2.60854
		2.49831	2.60193
		2.50515	2.60156
		2.50515	2.59939
		2.51188	2.59819
		2.49136	2.59475
		2.4624	2.59219
		2.50515	2.58934
		2.49136	2.58899
		2.50243	2.58883
		2.50515	2.58716
		2.49831	2.58682
		2.49136	2.58424
		2.50515	2.58174
		2.51851	2.58034
		2.49136	2.58003
		2.49136	2.57284
		2.47712	2.57149
		2.4843	2.57019
		2.47712	2.55968
		2.50515	2.55842
		2.49136	2.55691
		2.47712	2.55682
		2.49136	2.55645
		2.4624	2.55314
		2.47712	2.54993
		2.50515	2.54935
		2.50515	2.54435
		2.47712	2.54357
		2.47712	2.54012
		2.46982	2.5361
		2.4624	2.53596
		2.49136	2.53321
		2.45484	2.53244
		2.4843	2.5266
		2.4624	2.52414
		2.47712	2.52109
		2.49136	2.51734
		2.49136	2.51525
		2.46982	2.51525
		2.4624	2.51464
		2.4624	2.51042
		2.54407	2.51033
		2.45484	2.50932
		2.47712	2.50748
		2.47712	2.50548
		2.43136	2.49249
		2.4624	2.48999
		2.43933	2.4879
		2.46982	2.48661
		2.45484	2.48547
		2.4624	2.48522
		2.46982	2.48476
		2.47712	2.4839
		2.44716	2.47618
		2.44716	2.47519
		2.43933	2.45844
		2.45484	2.4579
		2.4624	2.45142
		2.44716	2.45019
		2.43933	2.44171
		2.43933	2.43751
		2.44716	2.43619
		2.43933	2.43103
		2.45484	2.41939
		2.44716	2.41835
		2.43136	2.40145
		2.43136	2.39728
		2.41497	2.39118
		2.43136	2.38874
		2.42325	2.3829
		2.44716	2.38277
		2.41497	2.38039
		2.40654	2.37749
		2.43136	2.37552
		2.41497	2.37324
		2.43136	2.37133
		2.43136	2.37018
		2.43136	2.35183
		2.39794	2.33856
		2.38021	2.33656
		2.41497	2.33256
		2.41497	2.32885
		2.39794	2.32545
		2.41497	2.32263
		2.40654	2.31875
		2.43136	2.31454
		2.38021	2.30741
		2.39794	2.30412
		2.39794	2.28789
		2.39794	2.28355
		2.37107	2.27951
		2.39794	2.27249
		2.38021	2.26947
		2.39794	2.26458
		2.38917	2.26432
		2.38021	2.26041
		2.38021	2.25479
		2.39794	2.25394
		2.37107	2.24435
		2.36173	2.24007
		2.39794	2.23606
		2.38021	2.23528
		2.37107	2.23421
		2.39794	2.22742
		2.38917	2.2243
		2.38021	2.2242
		2.38021	2.21595
		2.36173	2.21516
		2.38021	2.21299
		2.34242	2.21259
		2.38021	2.20962
		2.35218	2.20718
		2.36173	2.20564
		2.37107	2.20458
		2.38917	2.19678
		2.37107	2.186
		2.33244	2.17528
		2.35218	2.16711
		2.36173	2.16661
		2.36173	2.14987
		2.36173	2.14625
		2.36173	2.13383
		2.35218	2.11274
		2.33244	2.11072
		2.34242	2.10907
		2.36173	2.10738
		2.38917	2.09885
		2.34242	2.09082
		2.39794	2.09012
		2.32222	2.08983
		2.30103	2.08246
		2.33244	2.06603
		2.31175	2.04747
		2.33244	2.03615
		2.32222	2.02755
		2.32222	1.9993
		2.26717	1.89636
		2.27875	1.85455

## Sheet: Data for ANOVA Tests
species	location	group.ID	length	weight	condition
NC	A	NC.A	190	88.76	1.29407
NC	A	NC.A	180	92.78	1.59088
NC	A	NC.A	180	94.41	1.61883
NC	A	NC.A	200	107.37	1.34213
NC	A	NC.A	200	109.52	1.369
NC	A	NC.A	200	111.97	1.39962
NC	A	NC.A	215	115	1.15713
NC	A	NC.A	215	133.71	1.34539
NC	A	NC.A	210	135.73	1.46561
NC	A	NC.A	210	136.43	1.47317
NC	A	NC.A	200	137.36	1.717
NC	A	NC.A	215	138.72	1.3958
NC	A	NC.A	200	144.15	1.80187
NC	A	NC.A	220	145.7	1.36833
NC	A	NC.A	210	149.81	1.61764
NC	A	NC.A	220	155.6	1.46131
NC	A	NC.A	220	155.92	1.46431
NC	A	NC.A	220	161.98	1.52122
NC	A	NC.A	230	166.08	1.365
NC	A	NC.A	230	167.52	1.37684
NC	A	NC.A	230	170.54	1.40166
NC	A	NC.A	230	171.21	1.40717
NC	A	NC.A	230	173.57	1.42656
NC	A	NC.A	220	175.51	1.64829
NC	A	NC.A	230	176.17	1.44793
NC	A	NC.A	210	181.6	1.96091
NC	A	NC.A	240	201.71	1.45913
NC	A	NC.A	230	205.73	1.69089
NC	A	NC.A	240	208.56	1.50868
NC	A	NC.A	235	208.91	1.60974
NC	A	NC.A	240	210.66	1.52387
NC	A	NC.A	240	212.77	1.53913
NC	A	NC.A	240	216.94	1.5693
NC	A	NC.A	260	218	1.24033
NC	A	NC.A	240	222	1.6059
NC	A	NC.A	255	225.8	1.36177
NC	A	NC.A	250	226.39	1.4489
NC	A	NC.A	250	226.48	1.44947
NC	A	NC.A	240	231.56	1.67506
NC	A	NC.A	250	231.65	1.48256
NC	A	NC.A	245	233.06	1.58478
NC	A	NC.A	250	233.9	1.49696
NC	A	NC.A	245	237.1	1.61225
NC	A	NC.A	250	237.23	1.51827
NC	A	NC.A	240	244.21	1.76657
NC	A	NC.A	255	244.27	1.47316
NC	A	NC.A	250	254.04	1.62586
NC	A	NC.A	265	257.5	1.38369
NC	A	NC.A	255	258.14	1.55681
NC	A	NC.A	260	263.14	1.49716
NC	A	NC.A	260	267.69	1.52304
NC	A	NC.A	250	267.74	1.71354
NC	A	NC.A	260	295.68	1.68229
NC	A	NC.A	260	300.609	1.71034
NC	A	NC.A	270	309.42	1.57202
NC	A	NC.A	270	313.61	1.5933
NC	A	NC.A	260	316.99	1.80354
NC	A	NC.A	300	318.9	1.18111
NC	A	NC.A	265	322.86	1.73491
NC	A	NC.A	260	326.78	1.85924
NC	A	NC.A	295	330.41	1.28703
NC	A	NC.A	275	338.37	1.62702
NC	A	NC.A	280	339.66	1.54728
NC	A	NC.A	260	343.78	1.95596
NC	A	NC.A	270	345.82	1.75695
NC	A	NC.A	280	351.62	1.60177
NC	A	NC.A	280	354.32	1.61407
NC	A	NC.A	260	356.93	2.03078
NC	A	NC.A	270	361.78	1.83803
NC	A	NC.A	280	362	1.64905
NC	A	NC.A	280	385.96	1.7582
NC	A	NC.A	300	393.32	1.45674
NC	A	NC.A	300	393.7	1.45815
NC	A	NC.A	310	398	1.33597
NC	A	NC.A	295	400.67	1.5607
NC	A	NC.A	285	411.56	1.77786
NC	A	NC.A	290	418.45	1.71573
NC	A	NC.A	285	422.11	1.82344
NC	A	NC.A	300	425.45	1.57574
NC	A	NC.A	290	434.65	1.78216
NC	A	NC.A	300	440.49	1.63144
NC	A	NC.A	310	444.4	1.49173
NC	A	NC.A	310	455.73	1.52976
NC	A	NC.A	300	457.15	1.69315
NC	A	NC.A	290	469.47	1.92493
NC	A	NC.A	310	490.07	1.64503
NC	A	NC.A	320	495.31	1.51157
NC	A	NC.A	300	505.41	1.87189
NC	A	NC.A	310	505.49	1.69679
NC	A	NC.A	310	518.76	1.74133
NC	A	NC.A	310	535.78	1.79846
NC	A	NC.A	340	576.32	1.46631
NC	A	NC.A	330	585.33	1.62877
NC	A	NC.A	320	588.82	1.79694
NC	A	NC.A	335	591.04	1.57211
NC	A	NC.A	320	628.2	1.91711
NC	A	NC.A	335	648.32	1.72447
NC	A	NC.A	340	658.86	1.67632
NC	A	NC.A	350	754.53	1.75984
NC	A	NC.A	345	788.95	1.92129
NC	A	NC.A	350	811.79	1.89339
NC	A	NC.A	360	823.28	1.76457
NC	A	NC.A	360	836.24	1.79235
NC	A	NC.A	340	857.19	2.18092
NC	A	NC.A	390	883.04	1.48863
NC	A	NC.A	390	1048.4	1.76739
NC	A	NC.A	390	1083.62	1.82677
NC	A	NC.A	390	1159.48	1.95465
NC	A	NC.A	420	1257.69	1.69756
NC	A	NC.A	400	1275.29	1.99264
NC	A	NC.A	420	1336.55	1.804
NR	A	NR.A	170	60.37	1.22878
NR	A	NR.A	185	87.95	1.38906
NR	A	NR.A	190	92.18	1.34393
NR	A	NR.A	210	126.15	1.36216
NR	A	NR.A	240	162.05	1.17224
NR	A	NR.A	240	225.54	1.63151
NR	A	NR.A	260	238.28	1.35571
NR	A	NR.A	260	242.88	1.38188
NR	A	NR.A	245	243.89	1.65842
NR	A	NR.A	275	260.95	1.25476
NR	A	NR.A	290	263.9	1.08205
NR	A	NR.A	275	275.34	1.32395
NR	A	NR.A	280	280.6	1.27824
NR	A	NR.A	280	310.88	1.41618
NR	A	NR.A	300	337.16	1.24874
NR	A	NR.A	290	363.33	1.48973
NR	A	NR.A	290	363.6	1.49084
NR	A	NR.A	300	370.86	1.37356
NR	A	NR.A	340	424.8	1.08081
NR	A	NR.A	335	491.85	1.30827
NR	A	NR.A	300	522.01	1.93337
NR	A	NR.A	350	577.75	1.34752
NR	A	NR.A	330	589.61	1.64068
NR	A	NR.A	340	742.7	1.88963
NR	B	NR.B	440	1229.2	1.44299
NR	B	NR.B	450	1215.2	1.33355
NR	B	NR.B	470	1170.04	1.12696
NR	B	NR.B	440	1120.05	1.31486
NR	B	NR.B	425	1109.32	1.44507
NR	B	NR.B	420	1063.63	1.43563
NR	B	NR.B	410	1023	1.48431
NR	B	NR.B	425	1017.36	1.32528
NR	B	NR.B	430	1011.73	1.2725
NR	B	NR.B	425	974.61	1.26959
NR	B	NR.B	410	962.37	1.39634
NR	B	NR.B	435	953.51	1.1584
NR	B	NR.B	430	943.84	1.18712
NR	B	NR.B	430	937.01	1.17853
NR	B	NR.B	420	908.18	1.22581
NR	B	NR.B	410	900.36	1.30637
NR	B	NR.B	400	895.95	1.39992
NR	B	NR.B	430	867.2	1.09072
NR	B	NR.B	410	823.81	1.1953
NR	B	NR.B	400	810.57	1.26652
NR	B	NR.B	390	774.2	1.30515
NR	B	NR.B	390	758.12	1.27804
NR	B	NR.B	390	756.35	1.27506
NR	B	NR.B	360	754.41	1.61696
NR	B	NR.B	375	749.69	1.42163
NR	B	NR.B	390	743.54	1.25346
NR	B	NR.B	390	729.75	1.23021
NR	B	NR.B	360	718.87	1.54079
NR	B	NR.B	390	713.93	1.20354
NR	B	NR.B	350	700.09	1.63286
NR	B	NR.B	390	696.03	1.17337
NR	B	NR.B	370	684.4	1.35115
NR	B	NR.B	390	683.48	1.15221
NR	B	NR.B	370	683.41	1.3492
NR	B	NR.B	355	669.55	1.49657
NR	B	NR.B	370	666.75	1.31631
NR	B	NR.B	380	650.5	1.18549
NR	B	NR.B	370	648.02	1.27933
NR	B	NR.B	360	645.7	1.38396
NR	B	NR.B	350	642.64	1.49887
NR	B	NR.B	370	640.32	1.26413
NR	B	NR.B	370	640.27	1.26403
NR	B	NR.B	350	638.7	1.48968
NR	B	NR.B	380	635.72	1.15855
NR	B	NR.B	360	634.22	1.35935
NR	B	NR.B	340	632.79	1.60999
NR	B	NR.B	360	630.66	1.35172
NR	B	NR.B	352	628.47	1.44098
NR	B	NR.B	390	627.66	1.05811
NR	B	NR.B	370	621.36	1.2267
NR	B	NR.B	355	618.89	1.38334
NR	B	NR.B	370	616.92	1.21793
NR	B	NR.B	345	611.9	1.49013
NR	B	NR.B	380	611.39	1.11421
NR	B	NR.B	350	602.01	1.4041
NR	B	NR.B	375	600.06	1.13789
NR	B	NR.B	355	597.62	1.3358
NR	B	NR.B	355	596.91	1.33421
NR	B	NR.B	365	596.5	1.22668
NR	B	NR.B	365	596.45	1.22658
NR	B	NR.B	350	596.04	1.39018
NR	B	NR.B	350	593.41	1.38405
NR	B	NR.B	370	592.55	1.16982
NR	B	NR.B	345	591.73	1.44101
NR	B	NR.B	350	584.94	1.36429
NR	B	NR.B	340	583.31	1.4841
NR	B	NR.B	340	581.67	1.47993
NR	B	NR.B	345	580.15	1.41281
NR	B	NR.B	350	578.12	1.34838
NR	B	NR.B	340	568.33	1.44599
NR	B	NR.B	350	565.02	1.31783
NR	B	NR.B	365	564.15	1.16015
NR	B	NR.B	360	564.04	1.20893
NR	B	NR.B	345	562.35	1.36946
NR	B	NR.B	350	562.23	1.31132
NR	B	NR.B	340	557.24	1.41777
NR	B	NR.B	340	547.87	1.39393
NR	B	NR.B	330	546.69	1.52125
NR	B	NR.B	345	541.6	1.31893
NR	B	NR.B	330	538.34	1.49801
NR	B	NR.B	360	536.02	1.14888
NR	B	NR.B	360	535.25	1.14723
NR	B	NR.B	330	533.19	1.48368
NR	B	NR.B	330	529.36	1.47302
NR	B	NR.B	350	528.27	1.23212
NR	B	NR.B	335	520.4	1.38421
NR	B	NR.B	340	519.93	1.32284
NR	B	NR.B	345	517.04	1.25912
NR	B	NR.B	350	513.7	1.19813
NR	B	NR.B	340	510.04	1.29768
NR	B	NR.B	330	507	1.4108
NR	B	NR.B	350	505.69	1.17945
NR	B	NR.B	330	499.05	1.38868
NR	B	NR.B	325	492.25	1.43396
NR	B	NR.B	345	491.14	1.19605
NR	B	NR.B	320	490.93	1.4982
NR	B	NR.B	340	488.9	1.24389
NR	B	NR.B	335	488.54	1.29947
NR	B	NR.B	335	485.53	1.29146
NR	B	NR.B	340	485.03	1.23405
NR	B	NR.B	335	483.38	1.28574
NR	B	NR.B	315	480.75	1.53811
NR	B	NR.B	325	478.72	1.39454
NR	B	NR.B	335	476.21	1.26667
NR	B	NR.B	330	474.67	1.32084
NR	B	NR.B	350	472.41	1.10183
NR	B	NR.B	340	469.3	1.19403
NR	B	NR.B	315	463.01	1.48135
NR	B	NR.B	320	460.95	1.40671
NR	B	NR.B	310	458.14	1.53785
NR	B	NR.B	315	454.45	1.45397
NR	B	NR.B	330	449.26	1.25013
NR	B	NR.B	325	446.35	1.30025
NR	B	NR.B	325	445.8	1.29864
NR	B	NR.B	320	443.43	1.35324
NR	B	NR.B	320	442.72	1.35107
NR	B	NR.B	315	442.04	1.41426
NR	B	NR.B	330	428.7	1.19292
NR	B	NR.B	325	426.97	1.24379
NR	B	NR.B	315	425.39	1.36099
NR	B	NR.B	330	422.93	1.17687
NR	B	NR.B	315	421.85	1.34967
NR	B	NR.B	295	420.64	1.63849
NR	B	NR.B	320	419.96	1.28162
NR	B	NR.B	330	417.52	1.16181
NR	B	NR.B	310	415.65	1.39522
NR	B	NR.B	320	414.89	1.26614
NR	B	NR.B	310	411.25	1.38045
NR	B	NR.B	315	410.1	1.31207
NR	B	NR.B	330	410.07	1.14108
NR	B	NR.B	305	409.95	1.44488
NR	B	NR.B	320	408.12	1.24548
NR	B	NR.B	325	406.01	1.18273
NR	B	NR.B	315	399.88	1.27938
NR	B	NR.B	320	399.54	1.2193
NR	B	NR.B	320	397.55	1.21323
NR	B	NR.B	325	396.45	1.15488
NR	B	NR.B	310	393.32	1.32026
NR	B	NR.B	290	391.01	1.60322
NR	B	NR.B	320	388.45	1.18546
NR	B	NR.B	310	388.14	1.30288
NR	B	NR.B	318	388	1.20656
NR	B	NR.B	320	386.51	1.17953
NR	B	NR.B	315	386.21	1.23564
NR	B	NR.B	310	383.92	1.28871
NR	B	NR.B	320	381.72	1.16492
NR	B	NR.B	330	380.49	1.05877
NR	B	NR.B	310	380.22	1.27629
NR	B	NR.B	310	373.97	1.25531
NR	B	NR.B	300	372.81	1.38078
NR	B	NR.B	305	371.7	1.31007
NR	B	NR.B	300	362.81	1.34374
NR	B	NR.B	320	361.76	1.104
NR	B	NR.B	310	360.5	1.2101
NR	B	NR.B	300	360.43	1.33493
NR	B	NR.B	310	360.12	1.20882
NR	B	NR.B	290	357.39	1.46537
NR	B	NR.B	300	354.76	1.31393
NR	B	NR.B	320	354.28	1.08118
NR	B	NR.B	320	350.23	1.06882
NR	B	NR.B	300	349.6	1.29481
NR	B	NR.B	300	346.83	1.28456
NR	B	NR.B	295	343.64	1.33856
NR	B	NR.B	290	343.53	1.40854
NR	B	NR.B	310	341.36	1.14585
NR	B	NR.B	285	340.75	1.47198
NR	B	NR.B	305	336.2	1.18494
NR	B	NR.B	290	334.3	1.3707
NR	B	NR.B	300	331.96	1.22948
NR	B	NR.B	310	329.11	1.10473
NR	B	NR.B	310	327.53	1.09943
NR	B	NR.B	295	327.53	1.27581
NR	B	NR.B	290	327.07	1.34106
NR	B	NR.B	290	323.91	1.3281
NR	B	NR.B	350	323.84	0.755312
NR	B	NR.B	285	323.09	1.39569
NR	B	NR.B	300	321.72	1.19156
NR	B	NR.B	300	320.24	1.18607
NR	B	NR.B	270	310.81	1.57908
NR	B	NR.B	290	309.02	1.26705
NR	B	NR.B	275	307.54	1.47878
NR	B	NR.B	295	306.63	1.1944
NR	B	NR.B	285	305.82	1.32109
NR	B	NR.B	290	305.65	1.25323
NR	B	NR.B	295	305.32	1.18929
NR	B	NR.B	300	304.72	1.12859
NR	B	NR.B	280	299.35	1.36366
NR	B	NR.B	280	298.67	1.36056
NR	B	NR.B	275	287.37	1.38179
NR	B	NR.B	285	287.01	1.23983
NR	B	NR.B	290	282.76	1.15938
NR	B	NR.B	280	281.96	1.28444
NR	B	NR.B	275	276.51	1.32957
NR	B	NR.B	275	273.85	1.31678
NR	B	NR.B	280	273.02	1.24371
NR	B	NR.B	275	269.79	1.29726
NR	B	NR.B	285	262.66	1.13464
NR	B	NR.B	280	262.03	1.19365
NR	B	NR.B	270	252.03	1.28045
NR	B	NR.B	270	249.62	1.2682
NR	B	NR.B	260	246.14	1.40043
NR	B	NR.B	270	244.76	1.24351
NR	B	NR.B	265	241.49	1.29766
NR	B	NR.B	280	241.42	1.09976
NR	B	NR.B	260	240.1	1.36607
NR	B	NR.B	255	238.5	1.43836
NR	B	NR.B	270	237.42	1.20622
NR	B	NR.B	260	236.18	1.34376
NR	B	NR.B	270	235.14	1.19463
NR	B	NR.B	270	234.52	1.19149
NR	B	NR.B	270	224.82	1.1422
NR	B	NR.B	250	218.05	1.39552
NR	B	NR.B	240	217.05	1.5701
NR	B	NR.B	260	215.06	1.2236
NR	B	NR.B	260	213.23	1.21319
NR	B	NR.B	250	211.57	1.35405
NR	B	NR.B	260	210.2	1.19595
NR	B	NR.B	255	208.33	1.25641
NR	B	NR.B	270	206.32	1.04821
NR	B	NR.B	240	202.96	1.46817
NR	B	NR.B	250	201.43	1.28915
NR	B	NR.B	250	194.04	1.24186
NR	B	NR.B	250	192.11	1.2295
NR	B	NR.B	235	190.33	1.46657
NR	B	NR.B	250	187.28	1.19859
NR	B	NR.B	240	185.98	1.34534
NR	B	NR.B	250	183.9	1.17696
NR	B	NR.B	245	183.79	1.24975
NR	B	NR.B	240	182.14	1.31756
NR	B	NR.B	240	179.8	1.30064
NR	B	NR.B	250	179.45	1.14848
NR	B	NR.B	235	175.53	1.35253
NR	B	NR.B	230	173.81	1.42854
NR	B	NR.B	250	172.21	1.10214
NR	B	NR.B	240	171.9	1.24349
NR	B	NR.B	235	171.48	1.32133
NR	B	NR.B	250	168.82	1.08045
NR	B	NR.B	245	167.61	1.13973
NR	B	NR.B	240	167.57	1.21217
NR	B	NR.B	240	164.42	1.18938
NR	B	NR.B	230	164.12	1.34889
NR	B	NR.B	240	163.3	1.18128
NR	B	NR.B	220	163.15	1.53221
NR	B	NR.B	240	162.04	1.17216
NR	B	NR.B	225	161.13	1.41458
NR	B	NR.B	230	160.56	1.31964
NR	B	NR.B	235	160.17	1.23418
NR	B	NR.B	245	157.32	1.06976
NR	B	NR.B	235	153.46	1.18247
NR	B	NR.B	215	149.72	1.50648
NR	B	NR.B	225	146.93	1.28992
NR	B	NR.B	230	146.76	1.20621
NR	B	NR.B	230	141.21	1.1606
NR	B	NR.B	230	140.04	1.15098
NR	B	NR.B	230	136.09	1.11852
NR	B	NR.B	225	129.64	1.13813
NR	B	NR.B	215	129.04	1.2984
NR	B	NR.B	220	128.55	1.20727
NR	B	NR.B	230	128.05	1.05244
NR	B	NR.B	245	125.56	0.853794
NR	B	NR.B	220	123.26	1.15759
NR	B	NR.B	250	123.06	0.787584
NR	B	NR.B	210	122.98	1.32793
NR	B	NR.B	200	120.91	1.51137
NR	B	NR.B	215	116.42	1.17142
NR	B	NR.B	205	111.55	1.29482
NR	B	NR.B	215	108.68	1.09354
NR	B	NR.B	210	106.55	1.15052
NR	B	NR.B	210	99.84	1.07807
NR	B	NR.B	185	78.77	1.24407
NR	B	NR.B	190	71.54	1.04301
NC	B	NC.B	410	962.37	1.26906
NC	B	NC.B	340	649.51	1.29705
NC	B	NC.B	325	627.94	1.18916
NC	B	NC.B	320	502.47	1.59034
NC	B	NC.B	320	479.61	1.44416
NC	B	NC.B	325	465.43	1.57444
NC	B	NC.B	315	441.16	1.24495
NC	B	NC.B	295	428.52	1.27042
NC	B	NC.B	290	410.28	1.29045
NC	B	NC.B	300	398.41	1.3059
NC	B	NC.B	305	372.11	1.31896
NC	B	NC.B	290	366.32	1.53232
NC	B	NC.B	305	363.38	1.45796
NC	B	NC.B	285	358.31	1.39923
NC	B	NC.B	290	355.34	1.25615
NC	B	NC.B	290	346.33	1.45105
NC	B	NC.B	290	342.14	1.34184
NC	B	NC.B	260	323.7	1.60321
NC	B	NC.B	285	319.44	1.37992
NC	B	NC.B	270	315.56	1.84172
NC	B	NC.B	280	294.56	1.40285
NC	B	NC.B	270	285.61	1.42003
NC	B	NC.B	280	275.75	1.45697
NC	B	NC.B	270	275.41	1.54783
NC	B	NC.B	265	271.32	1.28074
NC	B	NC.B	260	269.32	1.50199
NC	B	NC.B	270	259.61	1.31151
NC	B	NC.B	270	257.04	1.47559
NC	B	NC.B	270	254	1.68223
NC	B	NC.B	265	236.42	1.66919
NC	B	NC.B	265	231.68	1.41145
NC	B	NC.B	240	217.65	1.35583
NC	B	NC.B	240	199.64	1.46365
NC	B	NC.B	225	181.15	1.53342
NC	B	NC.B	240	164.39	1.82923
NC	B	NC.B	220	138.11	1.65253
NC	B	NC.B	220	135.13	1.39634
